# Supplementary material
Source: MDPI journal article supplement (https://www.mdpi.com/2073-4395/12/11/2835)
Supplement: s1 [file s1]

Supplementary material table S1 (**Table S1**). Literature relationships evaluated for LAI retrieval.  
Equation and reference are presented.

| Nr. | VI                     | Equation                                  | Ref. | Nr | VI            | Equation                                 | Ref. |
|-----|------------------------|-------------------------------------------|------|----|---------------|------------------------------------------|------|
| 1   | RDVI                   | $y=0.0918\exp(6.0002x)$                   | [48] | 34 | Red EdgeWDRVI | $y=1.6x^2 + 9.6x - 0.25$                 | [36] |
| 2   | MSAVI                  | $y=0.1663\exp(4.2731x)$                   | [48] | 35 | MTCI          | $y= -0.11x^2 + 19x - 1.4$                | [36] |
| 3   | TVI2                   | $y=0.2227\exp(3.6566x)$                   | [48] | 36 | NDVI          | $y=0.059e^{4.82x}$                       | [58] |
| 4   | WDVI                   | $y = 0.109x - 0.3233$                     | [54] | 37 | NDVI          | $y=8.87x-4.6$                            | [58] |
| 5   | NDI                    | $y=13.448x-0.91876$                       | [77] | 38 | NDVI          | $y=6.31\ln(x)+3.88$                      | [58] |
| 6   | NDI                    | $y=6.753x$                                | [77] | 39 | WDVI          | $y=0.24e^{4.18x}$                        | [58] |
| 7   | NDI                    | $y=6.63x-0.13$                            | [77] | 40 | SAVI          | $y=0.06e^{4.83x}$                        | [58] |
| 8   | EVI                    | $y = (2.42x + 0.34)^2$                    | [55] | 41 | WDVI          | $y=7.73x-1.72$                           | [58] |
| 9   | RDVI                   | $y= 4.2815x - 0.3069$                     | [78] | 42 | SAVI          | $y=8.90x - 4.09$                         | [58] |
| 10  | NDVI                   | $y= 2.9792x - 0.4858$                     | [78] | 43 | SAVI          | $y=5.92\ln(x)+4.28$                      | [58] |
| 11  | NDVI                   | $y = \log_{0.6}[-(x - 0.943)/0.731]$      | [52] | 44 | WDVI          | $y=3.59\ln(x)+4.68$                      | [58] |
| 12  | SR                     | $y = x^{0.654} - 1.24$                    | [52] | 45 | TRBI          | $y = 4.39\exp(-1.42x)$                   | [49] |
| 13  | WDRVI2                 | $y = \log_{0.775}(1.61 - x) + 1.61$       | [52] | 46 | TRBI          | $y = 0.44x^2 - 3.27x + 3.84$             | [49] |
| 14  | TVI2                   | $y = \log_{0.81}(1.05 - x)$               | [52] | 47 | SR            | $y = -0.01x^2 + 0.33x + 0.55$            | [49] |
| 15  | GNDVI                  | $y = - \{[\ln(0.876 - x) + 0.66]/0.409\}$ | [52] | 48 | SR            | $y = 2.59\exp(0.01x) - 6.19\exp(-0.71x)$ | [49] |
| 16  | CI <sub>green</sub>    | $y = [(x - 0.931)/1.44]^{0.971}$          | [52] | 49 | NDVI783.665   | $y = 3.93x - 0.18$                       | [49] |
| 17  | EVI2                   | $y = (x + 0.863)4.08 - 0.863$             | [52] | 50 | NDVI783.665   | $y = 0.68\exp(1.78x)$                    | [49] |
| 18  | NDRE                   | $y = \log_{0.716}(0.88 - x) - 0.623$      | [52] | 51 | NDVI783.665   | $y = -1.98 x^2 + 5.93x - 0.55$           | [49] |
| 19  | TVI                    | $y = (x/8.85)^{1.73}$                     | [52] | 52 | NDI           | $y = - 6.51 x^2 + 9.33x + 0.16$          | [49] |
| 20  | CI <sub>red-edge</sub> | $y = [(x - 0.15)/0.642]^{0.775}$          | [52] | 53 | TRBI          | $y = -2.55x + 3.62$                      | [49] |
| 21  | MTCI                   | $y = (x - 1.49)^{0.926}$                  | [52] | 54 | SR            | $y = 0.15x + 1.11$                       | [49] |
| 22  | SR                     | $y=-0.008x^2+0.40x-0.25$                  | [36] | 55 | NDI           | $y = 3.58x + 0.91$                       | [49] |
| 23  | CI <sub>green</sub>    | $y=-0.018x^2+0.74x-0.54$                  | [36] | 56 | SR            | $y = 1.51\exp(0.04x)$                    | [49] |
| 24  | CI <sub>red-edge</sub> | $y=-0.036x^2+1.08x-0.07$                  | [36] | 57 | NDI           | $y = 1.33\exp(1.18x)$                    | [49] |
| 25  | MTCI                   | $y=-0.012x^2+0.90x-1.1$                   | [36] | 58 | WDVI          | $y = 0.1384e^{13.9611x}$                 | [57] |

|    |                        |                           |      |    |                        |                                         |      |
|----|------------------------|---------------------------|------|----|------------------------|-----------------------------------------|------|
| 26 | greenWDRVI             | $y=5.7x^2+1.7x-0.08$      | [36] | 59 | MSAVI                  | $y=0.0655e^{6.0641x}$                   | [57] |
| 27 | rededgeWDRVI           | $y=-1.6x^2+9.6x-0.29$     | [36] | 60 | NDVI                   | $y=0.1119e^{6.3954x}$                   | [57] |
| 28 | CI <sub>red-edge</sub> | $y=-0.067x^2+1.5x-0.22$   | [36] | 61 | NDVI                   | $y = [(x - 0.931)/1.44]^{0.971}$        | [59] |
| 29 | CI <sub>green</sub>    | $y=-0.003x^2+0.64x-0.37$  | [36] | 62 | CI <sub>green</sub>    | $y=1.677x+0.994$                        | [59] |
| 30 | CI <sub>green</sub>    | $y=-0.003x^2+0.64x-0.37$  | [36] | 63 | SR                     | $y=3.799x+0.468$                        | [59] |
| 31 | greenWDRVI             | $y=5.7x^2+1.7x-0.08$      | [36] | 64 | CI <sub>red-edge</sub> | $y=1.125x-0.230$                        | [59] |
| 32 | SR                     | $y=-0.0005x^2+0.20x+0.20$ | [36] | 65 | MTCI                   | $y=1.160x+1.036$                        | [59] |
| 33 | CI <sub>red-edge</sub> | $y=-0.067x^2+1.5x-0.22$   | [36] | 66 | NDVI                   | $y = (-1.6*\log(-1.36986*(x - 0.934)))$ | [59] |

Supplementary material table S2 (**Table S2**). R<sup>2</sup>, RMSE and nRMSE (%) obtained between field measured and retrieved LAI from physical approaches (LUT, NNET and PE<sub>physical</sub>)

| Method                      | VIs                 | Type                   | Equation                     | Ref        | nRMSE (%) | R <sup>2</sup> | RMSE |
|-----------------------------|---------------------|------------------------|------------------------------|------------|-----------|----------------|------|
| Empirical models            | SR                  | empirical              | $-0.114 + 0.349x$            | This paper | 8.36      | 0.95           | 0.66 |
|                             | VARIRededge         | linear                 | $-0.500 + 9.631x$            |            | 21.97     | 0.58           | 0.59 |
|                             | EVI2                | empirical polynomial   | $0.985 - 4.719x + 12.053$    |            | 17.36     | 0.69           | 0.50 |
|                             | MTCI                |                        | $0.921 + 0.229x + 0.007x^2$  |            | 29.85     | 0.13           | 0.48 |
|                             | MTVI2               |                        | $0.625 - 2.190x + 14.091x^2$ |            | 26.72     | 0.19           | 0.55 |
|                             | NDGI43              |                        | $1.498-8.048x + 13.528x^2$   |            | 19.30     | 0.70           | 0.86 |
| Literature empirical models | MSAVI               | literature exponential |                              | [57]       | 8.09      | 0.95           | 0.64 |
|                             | NDVI                | literature             |                              | [58]       | 28.27     | 0.19           | 0.45 |
|                             | VARIRededge         | linear                 |                              | [77]       | 25.65     | 0.38           | 0.60 |
|                             | MTVI2               | literature logarithmic |                              | [52]       | 18.18     | 0.67           | 0.52 |
|                             | rededgeWDRVI        | literature polynomial  |                              | [36]       | 18.60     | 0.70           | 0.83 |
| PROSAIL                     | CI <sub>green</sub> | synthetic              | $0.771 + 0.265x$             | This paper | 27.01     | 0.26           | 0.43 |
|                             | SR                  | linear                 | $0.605 + 0.157x$             |            | 26.70     | 0.20           | 0.55 |
|                             | NDRE                | synthetic polynomial   | $0.041 - 1.731x + 10.286x^2$ |            | 17.57     | 0.72           | 0.78 |
|                             | OSAVI               |                        | $0.301 - 3.421x + 10.82x^2$  |            | 16.60     | 0.75           | 0.81 |
|                             | RDVI                |                        | $-1.350 + 7.712x + 1.771x^2$ |            | 23.51     | 0.45           | 0.63 |
|                             | LUT                 | LUT                    | -                            |            | 17.73     | 0.78           | 0.78 |
|                             | NNET                | NNET                   | -                            |            | 28.56     | 0.35           | 0.71 |

Supplementary material table S3 (**Table S3**).  $R^2$ , RMSE and nRMSE (%) obtained between field measured and retrieved LAI from empirical, empirical literature models compared to  $PE_{\text{physical}}$

| Method                      | VIs         | Type                   | Ref        | nRMSE (%) | $R^2$ | RMSE |
|-----------------------------|-------------|------------------------|------------|-----------|-------|------|
| Empirical models            | CIre        | empirical              | This paper | 11.76     | 0.66  | 0.96 |
|                             | SR          | linear                 |            | 8.66      | 0.81  | 0.71 |
|                             | EVI2        |                        |            | 10.03     | 0.75  | 0.82 |
|                             | MSAVI       |                        |            | 10.00     | 0.75  | 0.81 |
|                             | NDGI43      |                        |            | 10.25     | 0.74  | 0.83 |
|                             | NDVI        | empirical              |            | 10.30     | 0.74  | 0.84 |
|                             | OSAVI       | polynomial             |            | 9.68      | 0.77  | 0.79 |
|                             | RDVI        |                        |            | 9.90      | 0.76  | 0.81 |
|                             | VARLrededge |                        |            | 10.95     | 0.70  | 0.89 |
|                             | WDRVI3      |                        |            | 9.37      | 0.78  | 0.76 |
| Literature empirical models | VARLrededge | literature linear      | [77]       | 12.81     | 0.67  | 1.04 |
|                             | RDVI        |                        | [48]       | 10.86     | 0.77  | 0.88 |
|                             | MSAVI       |                        | [48]       | 10.88     | 0.77  | 0.89 |
|                             | EVI2        | literature exponential | [52]       | 14.47     | 0.77  | 1.18 |
|                             | SR          |                        | [52]       | 9.55      | 0.81  | 0.78 |
|                             | NDGI43      |                        | [49]       | 13.52     | 0.70  | 1.10 |
|                             | NDVI        |                        | [52]       | 9.56      | 0.79  | 0.78 |
|                             | OSAVI       | literature logarithmic | [52]       | 29.47     | 0.81  | 2.40 |
|                             | WDRVI3      |                        | [52]       | 9.42      | 0.80  | 0.77 |
|                             | CIre        | literature polynomial  | [36]       | 11.06     | 0.70  | 0.90 |
|                             |             |                        |            |           |       |      |
| PROSAIL                     | EVI2        | synthetic linear       | This paper | 11.35     | 0.70  | 0.92 |
|                             | CIre        |                        |            | 12.76     | 0.70  | 1.04 |
|                             | MSAVI       |                        |            | 11.08     | 0.70  | 0.90 |
|                             | NDGI43      |                        |            | 14.19     | 0.72  | 1.16 |
|                             | NDVI        |                        |            | 14.43     | 0.70  | 1.18 |
|                             | OSAVI       | synthetic polynomial   |            | 10.34     | 0.77  | 0.84 |
|                             | RDVI        |                        |            | 11.50     | 0.69  | 0.94 |
|                             | SR          |                        |            | 13.35     | 0.82  | 1.09 |
|                             | VARLrededge |                        |            | 11.92     | 0.68  | 0.97 |
|                             | WDRVI3      |                        |            | 13.53     | 0.78  | 1.10 |

## Reference

36. Nguy-Robertson, A.L.; Peng, Y.; Gitelson, A.A.; Arkebauer, T.J.; Pimstein, A.; Herrmann, I.; Karnieli, A.; Rundquist, D.C.; Bonfil, D.J. Estimating Green {LAI} in Four Crops: Potential of Determining Optimal Spectral Bands for a Universal Algorithm. *Agric. For. Meteorol.* 2014, 192–193, 140–148.
48. Broge, N.H.; Leblanc, E. Comparing Prediction Power and Stability of Broadband and Hyperspectral Vegetation Indices for Estimation of Green Leaf Area Index and Canopy Chlorophyll Density. *Remote Sens. Environ.* 2001, 76, 156–172.
49. Pasqualotto, N.; Delegido, J.; van Wittenberghe, S.; Rinaldi, M.; Moreno, J. Multi-Crop Green LAI Estimation with a New Simple Sentinel-2 LAI Index (SeLI). *Sensors (Switzerland)* 2019, 19, doi:10.3390/s19040904.
52. Nguy-Robertson, A.; Gitelson, A.; Peng, Y.; Viña, A.; Arkebauer, T.; Rundquist, D. Green Leaf Area Index Estimation in Maize and Soybean: Combining Vegetation Indices to Achieve Maximal Sensitivity. *Agron. J.* 2012, 104, 1336–1347.
54. Clevers, J.G.P.W.; Kooistra, L.; van den Brande, M.M.M. Using Sentinel-2 Data for Retrieving LAI and Leaf and Canopy Chlorophyll Content of a Potato Crop. *Remote Sens (Basel)* 2017, 9, 1–15, doi:10.3390/rs9050405.
55. Kang, Y.; Özdoğan, M.; Zipper, S.C.; Román, M.O.; Walker, J.; Hong, S.Y.; Marshall, M.; Magliulo, V.; Moreno, J.; Alonso, L.; et al. How Universal Is the Relationship between Remotely Sensed Vegetation Indices and Crop Leaf Area Index? A Global Assessment. *Remote Sens (Basel)* 2016, 8, doi:10.3390/rs8070597.
57. Rinaldi, M.; Ruggieri, S.; Garofalo, P.; Vonella, A.V.; Satalino, G.; Soldo, P. Leaf Area Index Retrieval Using High Resolution Remote Sensing Data. *Italian Journal of Agronomy* 2010, 5, 155–166, doi:10.4081/ija.2010.155.
58. Papadavid, G. Mapping Potato Crop Height and Leaf Area Index through Vegetation Indices Using Remote Sensing in Cyprus. *J. Appl. Remote Sens.* 2011, 5, 53526.
59. Viña, A.; Gitelson, A.A.; Nguy-Robertson, A.L.; Peng, Y. Comparison of Different Vegetation Indices for the Remote Assessment of Green Leaf Area Index of Crops. *Remote Sens Environ* 2011, 115, 3468–3478, doi:10.1016/j.rse.2011.08.010.

60. Delegido, J.; Verrelst, J.; Meza, C.M.; Rivera, J.P.; Alonso, L.; Moreno, J. A Red-Edge Spectral Index for Remote Sensing Estimation of Green {LAI} over Agroecosystems. *Eur. J. Agron.* 2013, 46, 42–52.
61. Li, M.; Chu, R.; Yu, Q.; Islam, A.; Chou, S.; Shen, S. Evaluating Structural, Chlorophyll-Based and Photochemical Indices to Detect Summer Maize Responses to Continuous Water Stress. *Water* (Basel) 2018, 10, 500.
